# Supplementary material for: Near UV-pumped green-emitting Na3(Y,Sc)Si3O9:Eu2+ phosphor for white-emitting diodes
Source: Royal Society of Chemistry journal article supplement (doi:10.1039/c3tc30897a), 2013-01-01
Supplement: c3tc30897a.pdf [file c3tc30897a.pdf]

# Supporting Information

## Near UV-pumped green-emitting $\text{Na}_3(\text{Y,Sc})\text{Si}_3\text{O}_9:\text{Eu}^{2+}$ phosphor for white-emitting diodes

Zhiguo Xia<sup>\*a</sup>, Jun Zhou<sup>a</sup>, Zhiyong Mao<sup>b</sup>

**Table S1.** Fractional atomic coordinates and isotropic or equivalent isotropic displacement parameters ( $\text{\AA}^2$ )

|      | x           | y           | z           | $B_{\text{iso}}^*/B_{\text{eq}}$ | Occ. (<1)  |
|------|-------------|-------------|-------------|----------------------------------|------------|
| Sc1  | 0.3730 (7)  | 0.3691 (8)  | 0.3717 (6)  | 3.0 (2)                          | 0.496 (21) |
| Sc2  | 0.1107 (7)  | 0.1212 (8)  | 0.1100 (7)  | 3.0 (2)                          | 0.591 (25) |
| Sc3  | 0.3802 (9)  | 0.1185 (10) | 0.8643 (8)  | 3.0 (2)                          | 0.978 (19) |
| Sc4  | 0.1291 (10) | 0.3810 (10) | 0.6070 (8)  | 3.0 (2)                          | 1.000 (22) |
| Y1   | 0.3730 (7)  | 0.3691 (8)  | 0.3717 (6)  | 3.0 (2)                          | 0.504 (21) |
| Y2   | 0.1107 (7)  | 0.1212 (8)  | 0.1100 (7)  | 3.0 (2)                          | 0.409 (25) |
| Y3   | 0.3802 (9)  | 0.1185 (10) | 0.8643 (8)  | 3.0 (2)                          | 0.022 (19) |
| Y4   | 0.1291 (10) | 0.3810 (10) | 0.6070 (8)  | 3.0 (2)                          | 0.000 (22) |
| Si1  | 0.4770 (11) | 0.4769 (13) | 0.7538 (12) | 2.52 (17)                        |            |
| Si2  | 0.4884 (12) | 0.2497 (12) | 0.0272 (11) | 2.52 (17)                        |            |
| Si3  | 0.2343 (11) | 0.4680 (13) | 0.0171 (11) | 2.52 (17)                        |            |
| Si4  | 0.0232 (12) | 0.0163 (13) | 0.7636 (11) | 2.52 (17)                        |            |
| Si5  | 0.4977 (12) | 0.2647 (13) | 0.7319 (11) | 2.52 (17)                        |            |
| Si6  | 0.2286 (11) | 0.4911 (14) | 0.2295 (11) | 2.52 (17)                        |            |
| Si7  | 0.2828 (11) | 0.0204 (13) | 0.2200 (11) | 2.52 (17)                        |            |
| Si8  | 0.2738 (12) | 0.2725 (13) | 0.9876 (12) | 2.52 (17)                        |            |
| Si9  | 0.4842 (11) | 0.2526 (12) | 0.5359 (11) | 2.52 (17)                        |            |
| Si10 | 0.2259 (11) | 0.0251 (12) | 0.5153 (11) | 2.52 (17)                        |            |
| Si11 | 0.0319 (11) | 0.2299 (12) | 0.7833 (11) | 2.52 (17)                        |            |
| Si12 | 0.2713 (11) | 0.2302 (13) | 0.5248 (11) | 2.52 (17)                        |            |

|      |             |             |             |         |  |
|------|-------------|-------------|-------------|---------|--|
| Na1  | 0.136 (2)   | 0.397 (2)   | 0.4080 (15) | 1.9 (2) |  |
| Na2  | 0.101 (2)   | 0.160 (2)   | 0.6397 (18) | 1.9 (2) |  |
| Na3  | 0.3853 (19) | 0.097 (2)   | 0.6202 (17) | 1.9 (2) |  |
| Na4  | 0.4340 (17) | 0.502 (2)   | 1.0068 (18) | 1.9 (2) |  |
| Na5  | 0.1661 (17) | 0.122 (3)   | 0.9002 (16) | 1.9 (2) |  |
| Na6  | 0.124 (2)   | 0.400 (2)   | 0.8387 (15) | 1.9 (2) |  |
| Na7  | 0.1917 (19) | 0.212 (2)   | 0.3315 (15) | 1.9 (2) |  |
| Na8  | 0.0515 (17) | 0.023 (2)   | 0.5452 (18) | 1.9 (2) |  |
| Na9  | 0.136 (2)   | 0.357 (2)   | 0.0879 (16) | 1.9 (2) |  |
| Na10 | 0.2367 (19) | 0.262 (3)   | 0.222 (2)   | 1.9 (2) |  |
| Na11 | 0.4075 (17) | 0.141 (2)   | 0.3776 (18) | 1.9 (2) |  |
| Na12 | 0.2745 (17) | 0.264 (2)   | 0.7158 (18) | 1.9 (2) |  |
| O1   | 0.3326 (14) | 0.4775 (14) | 0.4493 (14) | 2       |  |
| O2   | 0.1029 (13) | 0.2873 (15) | 0.7248 (12) | 2       |  |
| O3   | 0.4371 (12) | 0.2815 (17) | 0.2703 (13) | 2       |  |
| O4   | 0.4945 (16) | 0.1771 (15) | 0.9424 (12) | 2       |  |
| O5   | 0.3744 (12) | 0.2341 (18) | 0.5689 (17) | 2       |  |
| O6   | 0.2745 (15) | 0.0463 (14) | 0.7829 (13) | 2       |  |
| O7   | 0.2493 (19) | 0.3749 (16) | 0.9542 (19) | 2       |  |
| O8   | 0.2864 (17) | 0.2122 (14) | 0.9022 (12) | 2       |  |
| O9   | 0.0554 (13) | 0.3076 (14) | 0.5142 (14) | 2       |  |
| O10  | 0.3822 (12) | 0.0362 (14) | 0.2639 (14) | 2       |  |
| O11  | 0.0946 (11) | 0.2166 (15) | 0.2209 (13) | 2       |  |
| O12  | 0.1796 (15) | 0.0074 (19) | 0.6166 (11) | 2       |  |
| O13  | 0.0294 (17) | 0.226 (2)   | 0.3720 (12) | 2       |  |
| O14  | 0.2132 (18) | 0.4499 (19) | 0.1309 (10) | 2       |  |
| O15  | 0.4863 (16) | 0.0213 (17) | 0.8312 (12) | 2       |  |
| O16  | 0.3753 (12) | 0.2608 (19) | 0.0374 (14) | 2       |  |
| O17  | 0.4682 (15) | 0.4662 (19) | 0.3183 (12) | 2       |  |
| O18  | 0.2092 (15) | 0.4236 (13) | 0.7179 (15) | 2       |  |
| O19  | 0.239 (2)   | 0.1314 (15) | 0.4874 (18) | 2       |  |
| O20  | 0.0077 (15) | 0.2935 (19) | 0.8699 (13) | 2       |  |

|     |             |             |             |   |  |
|-----|-------------|-------------|-------------|---|--|
| O21 | 0.4509 (14) | 0.3671 (13) | 0.7446 (16) | 2 |  |
| O22 | 0.4657 (16) | 0.3444 (13) | 0.4802 (14) | 2 |  |
| O23 | 0.1692 (12) | 0.4787 (15) | 0.5105 (16) | 2 |  |
| O24 | 0.0384 (15) | 0.0175 (18) | 0.1662 (12) | 2 |  |
| O25 | 0.1722 (11) | 0.0168 (17) | 0.0322 (17) | 2 |  |
| O26 | 0.0572 (14) | 0.1200 (14) | 0.7994 (18) | 2 |  |
| O27 | 0.2220 (13) | 0.1036 (14) | 0.1983 (16) | 2 |  |
| O28 | 0.1234 (13) | 0.4833 (16) | 0.2726 (15) | 2 |  |
| O29 | 0.0292 (13) | 0.4822 (15) | 0.6497 (12) | 2 |  |
| O30 | 0.4416 (18) | 0.1956 (15) | 0.7783 (14) | 2 |  |
| O31 | 0.0491 (15) | 0.1686 (14) | 0.9924 (14) | 2 |  |
| O32 | 0.2009 (12) | 0.2289 (19) | 0.0507 (14) | 2 |  |
| O33 | 0.2812 (14) | 0.4242 (14) | 0.2912 (12) | 2 |  |
| O34 | 0.2796 (18) | 0.2898 (15) | 0.4352 (13) | 2 |  |
| O35 | 0.3186 (15) | 0.0251 (15) | 0.9462 (12) | 2 |  |
| O36 | 0.2054 (12) | 0.2668 (15) | 0.5875 (12) | 2 |  |

**Table S2.** Main bond lengths (Å)

|                      |          |                        |          |
|----------------------|----------|------------------------|----------|
| Sc1—O1               | 2.07 (2) | Si11—O20               | 1.64 (3) |
| Sc1—O3               | 2.21 (2) | Si11—O26               | 1.69 (3) |
| Sc1—O17              | 2.17 (3) | Si12—O5                | 1.66 (3) |
| Sc1—O22              | 2.15 (2) | Si12—O19               | 1.64 (3) |
| Sc1—O33              | 1.99 (2) | Si12—O34               | 1.61 (3) |
| Sc1—O34              | 2.05 (3) | Si12—O36               | 1.46 (3) |
| Sc2—O11              | 2.19 (2) | Na1—O9                 | 2.38 (3) |
| Sc2—O24              | 2.05 (3) | Na1—O23                | 2.02 (4) |
| Sc2—O25              | 2.14 (3) | Na1—O28                | 2.40 (3) |
| Sc2—O27              | 2.12 (2) | Na1—O33                | 2.79 (3) |
| Sc2—O31 <sup>i</sup> | 2.10 (2) | Na1—O34                | 2.67 (4) |
| Sc2—O32              | 2.26 (3) | Na2—O2                 | 2.27 (4) |
| Sc3—O4               | 2.23 (3) | Na2—O3 <sup>viii</sup> | 2.90 (4) |

|                         |          |                         |          |
|-------------------------|----------|-------------------------|----------|
| Sc3—O6                  | 2.25 (3) | Na2—O9                  | 2.96 (4) |
| Sc3—O8                  | 2.04 (3) | Na2—O12                 | 2.57 (4) |
| Sc3—O15                 | 2.19 (3) | Na2—O17 <sup>vii</sup>  | 2.78 (4) |
| Sc3—O30                 | 1.94 (3) | Na2—O22 <sup>viii</sup> | 2.68 (4) |
| Sc3—O35                 | 2.06 (3) | Na2—O26                 | 2.54 (4) |
| Sc4—O2                  | 2.27 (2) | Na2—O36                 | 2.35 (4) |
| Sc4—O9                  | 2.07 (2) | Na3—O5                  | 2.18 (4) |
| Sc4—O18                 | 2.13 (3) | Na3—O19                 | 2.98 (4) |
| Sc4—O23                 | 2.13 (3) | Na3—O24 <sup>vi</sup>   | 2.15 (4) |
| Sc4—O29                 | 2.20 (3) | Na3—O25 <sup>vi</sup>   | 2.30 (4) |
| Sc4—O36                 | 2.05 (3) | Na3—O30                 | 2.90 (4) |
| Si1—O15 <sup>ii</sup>   | 1.53 (3) | Na4—O9 <sup>iv</sup>    | 2.82 (4) |
| Si1—O21                 | 1.68 (3) | Na4—O23 <sup>iv</sup>   | 1.55 (3) |
| Si1—O24 <sup>iii</sup>  | 1.50 (3) | Na4—O29 <sup>iv</sup>   | 2.21 (3) |
| Si1—O28 <sup>iv</sup>   | 1.62 (3) | Na5—O6                  | 2.63 (4) |
| Si2—Si11 <sup>iii</sup> | 2.92 (2) | Na5—O8                  | 2.22 (4) |
| Si2—O4 <sup>i</sup>     | 1.66 (3) | Na5—O25 <sup>x</sup>    | 2.52 (4) |
| Si2—O16                 | 1.69 (3) | Na5—O26                 | 2.20 (3) |
| Si2—O20 <sup>iii</sup>  | 1.69 (3) | Na5—O31                 | 2.32 (3) |
| Si2—O31 <sup>iii</sup>  | 1.54 (3) | Na5—O32 <sup>x</sup>    | 2.80 (4) |
| Si3—Si8 <sup>i</sup>    | 2.99 (3) | Na5—O35                 | 2.76 (4) |
| Si3—O1 <sup>v</sup>     | 1.63 (3) | Na6—O1 <sup>iv</sup>    | 2.54 (4) |
| Si3—O7 <sup>i</sup>     | 1.68 (3) | Na6—O2                  | 2.40 (3) |
| Si3—O14                 | 1.75 (2) | Na6—O7                  | 2.56 (4) |
| Si3—O23 <sup>v</sup>    | 1.63 (3) | Na6—O17 <sup>iv</sup>   | 2.43 (4) |
| Si4—Si7 <sup>vi</sup>   | 2.99 (2) | Na6—O18                 | 2.23 (3) |
| Si4—O10 <sup>vi</sup>   | 1.60 (3) | Na6—O20                 | 2.38 (4) |
| Si4—O17 <sup>vii</sup>  | 1.49 (3) | Na7—O11                 | 2.19 (3) |
| Si4—O26                 | 1.70 (3) | Na7—O13                 | 2.48 (4) |
| Si4—O29 <sup>viii</sup> | 1.59 (3) | Na7—O19                 | 2.71 (4) |
| Si5—Si9                 | 2.94 (2) | Na7—O27                 | 2.60 (4) |
| Si5—O11 <sup>iii</sup>  | 1.62 (2) | Na7—O34                 | 2.33 (4) |

|                        |          |                         |          |
|------------------------|----------|-------------------------|----------|
| Si5—O13 <sup>iii</sup> | 1.63 (3) | Na8—O12                 | 2.19 (3) |
| Si5—O21                | 1.68 (3) | Na8—O17 <sup>vii</sup>  | 2.38 (3) |
| Si5—O30                | 1.49 (3) | Na8—O22 <sup>vii</sup>  | 2.37 (4) |
| Si6—O14                | 1.61 (3) | Na8—O35 <sup>ix</sup>   | 2.53 (3) |
| Si6—O18 <sup>v</sup>   | 1.57 (3) | Na9—O4 <sup>vii</sup>   | 2.20 (4) |
| Si6—O28                | 1.69 (3) | Na9—O7 <sup>i</sup>     | 2.62 (4) |
| Si6—O33                | 1.56 (3) | Na9—O11                 | 2.94 (4) |
| Si7—O6 <sup>ix</sup>   | 1.61 (3) | Na9—O14                 | 1.90 (4) |
| Si7—O10                | 1.63 (3) | Na9—O32                 | 2.19 (4) |
| Si7—O12 <sup>ix</sup>  | 1.69 (2) | Na10—O11                | 2.20 (3) |
| Si7—O27                | 1.56 (3) | Na10—O27                | 2.38 (4) |
| Si8—O7                 | 1.64 (3) | Na10—O32                | 2.66 (4) |
| Si8—O8                 | 1.57 (3) | Na10—O33                | 2.70 (4) |
| Si8—O16 <sup>x</sup>   | 1.68 (3) | Na11—O3                 | 2.67 (4) |
| Si8—O32 <sup>x</sup>   | 1.57 (3) | Na11—O9 <sup>iii</sup>  | 2.82 (3) |
| Si9—O5                 | 1.72 (3) | Na11—O10                | 2.33 (4) |
| Si9—O9 <sup>iii</sup>  | 1.57 (3) | Na11—O19                | 2.99 (4) |
| Si9—O13 <sup>iii</sup> | 1.56 (3) | Na11—O29 <sup>iii</sup> | 2.59 (4) |
| Si9—O22                | 1.62 (3) | Na12—O2                 | 2.56 (3) |
| Si10—O12               | 1.68 (2) | Na12—O5                 | 2.68 (4) |
| Si10—O19               | 1.64 (3) | Na12—O8                 | 2.89 (3) |
| Si10—O25 <sup>vi</sup> | 1.65 (2) | Na12—O18                | 2.56 (4) |
| Si10—O35 <sup>ix</sup> | 1.43 (3) | Na12—O30                | 2.83 (4) |
| Si11—O2                | 1.61 (3) | Na12—O36                | 2.17 (3) |
| Si11—O3 <sup>vii</sup> | 1.62 (2) |                         |          |

Symmetry codes: (i)  $x, y, z-1$ ; (ii)  $-x+1, y+1/2, -z+3/2$ ; (iii)  $x+1/2, -y+1/2, -z+1$ ; (iv)  $-x+1/2, -y+1, z+1/2$ ; (v)  $-x+1/2, -y+1, z-1/2$ ; (vi)  $-x+1/2, -y, z+1/2$ ; (vii)  $x-1/2, -y+1/2, -z+1$ ; (viii)  $-x, y-1/2, -z+3/2$ ; (ix)  $-x+1/2, -y, z-1/2$ ; (x)  $x, y, z+1$ .
